1 Rapid antigen testing for SARS-CoV-2 infection in a university setting in

2 Ireland: learning from a 6-week pilot study.

3 Gerald Barry<sup>1</sup>, Catherine McCarney, Marc Farrelly, Rory Breathnach, Carmel Mooney, Simon J. More<sup>2</sup>

4 School of Veterinary Medicine, University College Dublin, Belfield, Dublin D04 W6F6, Ireland

5 1. [gerald.barry@ucd.ie](mailto:gerald.barry@ucd.ie)

6 2. [simon.more@ucd.ie](mailto:simon.more@ucd.ie)

7

8 **Abstract**

9 Objectives

10 With the ongoing circulation of SARS-CoV-2 in countries across the world it is essential to  
11 identify effective ways to reduce the risk of infection while allowing society to function as  
12 close to 'normal' as possible. Serial testing using rapid lateral flow antigen tests is a possible  
13 way to do this by screening populations in a targeted way, identifying infectious (both  
14 symptomatic and asymptomatic) people and removing them from circulation while  
15 infectious. To make rapid antigen testing effective, high levels of participation are  
16 important. This study was designed to evaluate the establishment of a testing programme in  
17 a university setting and assess some of the factors that impact participation in such a study  
18 among both staff and students.

19 Study Design

20 Observational, survey

21 Methods

22 A trial period of SARS-CoV-2 rapid testing using the Abbott Panbio rapid antigen test was set  
23 up and staff and students based in the University College Dublin Veterinary Hospital were  
24 asked to take part voluntarily for 6 weeks. Following the trial period, we used a  
25 questionnaire to evaluate satisfaction and to understand some reasons behind participation  
26 or lack thereof.

27 Results

28 Overall, almost all respondents to the survey stated that they were happy with having a  
29 testing programme present in the workplace and it helped to reduce anxiety associated with  
30 COVID-19. Findings indicated that staff and students did not participate equally in the  
31 voluntary testing programme. The findings also highlighted that intrinsic motivations and  
32 extrinsic motivations for participation differ. For example, participation among staff was  
33 much higher than among students, motivational messaging focused on protecting others did  
34 not resonate with students as much as staff, convenience was a key factor driving  
35 participation in both cohorts and the pressure of being forced to miss class (if positive) close  
36 to exam time provided motivation to students to avoid testing.

### 37 Conclusions

38 Introducing antigen testing into a workplace helped to reduce overall anxiety associated  
39 with the potential impact of COVID-19, but achieving good participation was challenging.  
40 Participation is key to a successful, campus wide antigen testing programme but reaching  
41 high levels of participation is not straightforward and can not be taken for granted. Different  
42 motivations drive participation in different cohorts and different messaging/incentivisation  
43 is needed to encourage participation in those different cohorts. The findings reported here  
44 should inform any SARS-CoV-2 testing programme that will run in these types of settings in  
45 the future.

46

### 47 **1. Introduction**

48 The COVID-19 pandemic that started in China in late 2019 has caused disruption to the whole world  
49 in one form or another. The betacoronavirus, SARS-CoV-2, that causes COVID-19, primarily transmits  
50 between people in aerosol droplets, so close contact in poorly ventilated indoor environments are  
51 areas of high risk of transmission if an infected person is present. In Ireland, as elsewhere, the  
52 isolation of infectious individuals is central to efforts to limit SARS-CoV-2 transmission. People with  
53 symptoms are asked to self-isolate, however, this does not remove the risk posed by pre-  
54 symptomatic and asymptomatic individuals. Pre-symptomatic transmission is known to be  
55 substantial<sup>1</sup> and asymptomatic or mildly symptomatic individuals may also shed virus at levels  
56 sufficient to infect others<sup>2</sup>. There is considerable heterogeneity in estimates of relatively  
57 infectiousness of symptomatic and asymptomatic people, and no conclusive evidence of difference<sup>3</sup>.  
58 Further, SARS-CoV-2 does not shed from infected people equally, with approximately 2% of infected

59 people carrying approximately 90% of the total virus load in a population at any one time. The  
60 distribution of viral loads, by PCR test, cannot be distinguished according to symptoms suggesting  
61 that people shedding large amounts of virus are as likely to be asymptomatic as symptomatic<sup>4</sup>. Viral  
62 load is associated with increased likelihood to shed infectious virus, so those people with the most  
63 virus in their upper respiratory tract are the most likely to infect others and to be associated with  
64 superspreading events<sup>5</sup>. Collectively, in the context of effective disease control, these factors  
65 highlight the need to identify those with the highest virus loads, regardless of their clinical  
66 presentation.

67 Antigen-detecting rapid diagnostic tests (Ag-RDTs) offer a means to rapidly identify infected  
68 individuals, with the potential to substantially reduce the risk of onward SARS-CoV-2 transmission.  
69 However, like every diagnostic test, rapid antigen tests are not perfect and there are both strengths  
70 and weaknesses with them. An Ag-RDTs using a lateral flow device (LFD) has a lower sensitivity than  
71 PCR. In a detailed review, sensitivity of Ag-RDT was estimated to be 72.0% (95% confidence interval  
72 63.7-79.0) and 58.1% (40.2-74.1) for symptomatic and asymptomatic individuals<sup>6</sup>, respectively, but  
73 noting that sensitivity does vary between test manufacturers<sup>7</sup> and will be operator-dependent<sup>8</sup>.  
74 Although Ag-RDTs have a higher risk of false negatives than PCR, infected people test positive by LFD  
75 during a relatively narrow window of the infectious period, coincident with the period of highest  
76 viral load (see figure 1<sup>8</sup>) when individuals are likely most infectious<sup>9</sup>. Ag-RDT results are informative  
77 at a single point in time, and will not, for example, test positive for those in their latent period (0-3  
78 days following initial infection approximately). On the other hand, most Ag-RDTs have very high  
79 specificity, recently estimated at 99.5% (98.5-99.8) and 98.9% (93.6-99.8) in symptomatic and  
80 asymptomatic individuals respectively<sup>6</sup>.

81 The World Health Organisation recommends the use of Ag-RDTs in specific situations, including  
82 outbreak investigation/contact tracing, monitoring trends in disease incidence, widespread  
83 community transmission and to test asymptomatic contacts of cases (World Health Organisation,  
84 2020). In contrast, the use of Ag-RDTs can be problematic in populations with low infection  
85 prevalence and low pre-test probability. In these settings, the positive predictive values will be low  
86 (leading to a high proportion of false positive results) when testing is conducted at large-scale<sup>7</sup>. In  
87 situations where the pre-test probability is low-to-moderate, Ag-RDT results must be interpreted  
88 with care. In these settings, a Ag-RDT positive should be considered preliminary, with individuals  
89 isolating until a PCR test result is known. Ag-RDT negative individuals should continue to comply with  
90 conventional risk mitigation measures<sup>10</sup>. Ag-RDTs will be most effective when used regularly, with  
91 high levels of participation.

92 In the UK, Ag-RDTs have been used in universities, schools and care homes<sup>11,12</sup> to rapidly identify –  
93 and remove – those asymptomatic people who are shedding high amounts of virus. Early results  
94 from a pilot at the University of Liverpool were disappointing, with approximately half of cases  
95 missed (a sensitivity in comparison to the PCR of 48.9%, specificity of 99.93%)<sup>11</sup>. In Ireland, there is  
96 now considerable experience in the use of Ag-RDTs to detect SARS-CoV-2 infection in meat  
97 processing plant workers, which is recognised as a high-risk setting. In these situations, once or  
98 twice-weekly Ag-RDTs has been suggested as a viable alternative to once-monthly RT-PCR serial  
99 testing, specifically with the aim to identify and isolate asymptomatic individuals<sup>13</sup>.

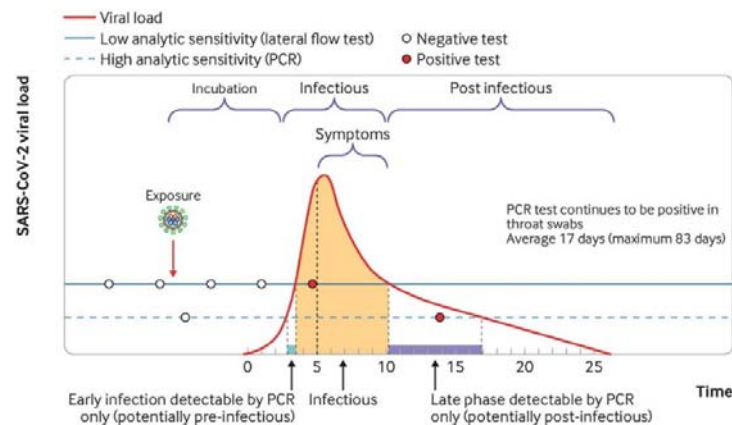

100

101 Figure 1. An illustration of the average time taken to reach peak viral load and its association with  
102 symptoms and the sensitivity of both the PCR test and the antigen test. Taken from<sup>8</sup>

103 This study was conducted to investigate the feasibility and limitations of an antigen testing  
104 programme conducted in a university environment which was considered at higher risk of SARS-CoV-  
105 2 transmission.

## 106 2. Methods:

### 107 a. The setting

108 University College Dublin (UCD) Veterinary Hospital is a critical teaching resource for the UCD School  
109 of Veterinary Medicine staffed with approx. 120 clinicians and postgraduate students. It also  
110 accommodates a series of clinical rotations for approximately 170 final year veterinary and  
111 veterinary nursing students for much of the academic year. The veterinary hospital remained open  
112 throughout the pandemic, handling almost 10,000 cases in 2020, but was considered at higher risk  
113 of SARS-CoV-2 introduction and spread, in part due to the density of staff and students and the  
114 nature of the work (in terms of close contact with staff and animal owners) when handling and  
115 treating animals appropriately. A pod-based approach was implemented in early 2020 but could not  
116 be sustained once hospital caseload returned towards normal levels, in large part because of

117 broader health and safety concerns associated with limited staff numbers. From March 2020, a  
118 range of mitigation measures were put in place following detailed risk assessment, including a  
119 review of student rotations, PPE, physical distancing etc. From 2021, further measures were  
120 considered, given the serious national picture (7-day incidence, levels of community transmission),  
121 the emergence of SARS-CoV-2 variants, and in light of staff anxieties in the context of returning  
122 student rotations. As a consequence, and in the interests of business continuity, there was further  
123 evaluation of final year teaching, changes to teaching timelines, the introduction of higher  
124 specification face masks and the strategic placement of air purifying units. Further, as reported here,  
125 a pilot study of testing using a Ag-RDT was conducted with veterinary hospital staff and students  
126 over a 6-week period from 24 March to 29 April 2021, coinciding with a national 14-day incidence of  
127 confirmed COVID-19 cases of between 159.54 and 127.26 per 100,000 population at the start and  
128 the end of this period, respectively.

129 b. Recruitment of participants:

130 An information drive was established prior to the start of the pilot study, including information  
131 videos, circulation of written information and a webinar to explain the principles of the test and the  
132 reasons for doing the pilot. Veterinary hospital staff and students received an initial invitation and  
133 follow-up reminders during the first three weeks of the study. Participation was voluntary, and all  
134 participants were required to read and sign a consent form (supplementary file 1) before their first  
135 test. The study was conducted with approval from the UCD Human Research Ethics Committee,  
136 approval number LS-21-20-Barry.

137 c. The testing regime

138 The Panbio™ COVID-19 Ag rapid test device (Abbott, Ireland) was used for all tests. The nasal test  
139 swab was self-administered under supervision from a trained tester. Training videos and were also  
140 provided in advance of the first day of testing. Swabs were then tested using a lateral flow device by  
141 a trained tester independent of the person that had been swabbed. All test swabs were labelled with  
142 a code so testers did not know who they were testing.

143 Testing was carried out each Monday and Thursday. A person being tested entered a designated  
144 room, they were directed to a swabbing station, and they were then instructed how to perform the  
145 swab. The swabbing was then observed to ensure correct technique before the swab was placed in a  
146 test tube for analysis by the testing team. The swabber being tested was allowed to leave after being  
147 swabbed and their swab was analysed within 30 minutes of the swab taking place. If the person was  
148 negative, they were not contacted, but if they were positive, they were informed verbally as soon as

149 the result came through. A rubric for how a positive person should act after testing positive was  
150 generated and used to guide candidates that tested positive.

#### 151 d. Participation

152 For staff, audit was conducted on Monday and Thursday of week four of the study to determine the  
153 total number present in the hospital and eligible to participate in testing. Staff participation was  
154 calculated for each of these two days. For students, rotation information was reviewed to determine  
155 the number present at each of 8 days during weeks 2-5 of the study. Average student participation  
156 over these 8 days was determined.

#### 157 e. Follow-up questionnaire

158 At the end of the 6-week trial, a link to an electronic survey (supplementary file 2) was sent by email  
159 to all staff and students that could have taken part in the study. Importantly, this included both  
160 those that participated and those that did not but were eligible to do so.

### 161 3. Results

#### 162 a. Participants

163 A total of 159 people attended at least once for testing during the pilot, including 112 staff and 47  
164 students. The staff were working in a variety of roles within the veterinary hospital, whereas the  
165 students were all final year veterinary medicine or veterinary nursing students.

#### 166 b. Test results

167 A total of 798 tests were performed across a 6-week period with no positives recorded. No member  
168 of staff or of the student cohort reported any symptoms associated with COVID-19 or tested positive  
169 by PCR independent of the trial. Staff participation was 90% and 75% on the 2 audited days, whereas  
170 the average student participation was 19%.

#### 171 c. Survey results

172 A total of 128 people participated in the survey, including 88 staff and 38 students.

173 *Level of participation.* When asked about their level of participation, the 127 people who responded  
174 to this question said they had participated as often as possible, however, 20% participated less than  
175 3 times, and 15% said they had not participated at all (Figure 1).

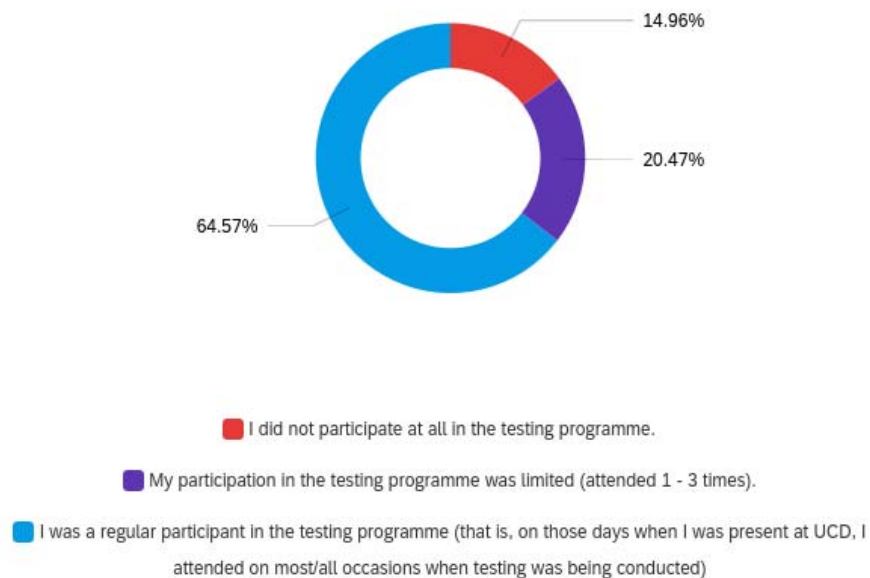

176

177 Figure 1. Answers to the question: 'Which of the following best describes your level of participation  
178 in the COVID-19 rapid antigen testing pilot?' 127 people responded.

179

180 *Reasons for limited or no participation.* Of the 19 people who said they didn't participate, 13  
181 provided reasons for non-participation, and of the 26 people who participated between 1 and 3  
182 times, 21 provided reasons why they did not participate more. Collectively, the reasons for limited or  
183 no participation among these 34 respondents included the following: 1 said they were not  
184 interested, 1 said they didn't want to risk a positive result, 8 said they did not have enough time, 2  
185 people chose not to attend because they felt they were at low risk and didn't need to attend, and  
186 others indicated that their time on campus was limited [11] or when on campus they did not have  
187 time to participate [7 people]. The remainder [4 people] said that they simply forgot to attend, even  
188 when on campus.

189 *Opportunities to increase participation.* There were a total of 81 respondents to this question, and  
190 answers can be grouped into the following 4 themes:

- 191
- 192 • **Reminders:** Many people indicated that a reminder on the day of the test would have been  
193 useful. This could have come as a text message or an email, but forgetting to attend was  
clearly an issue for many.
  - 194 • **Convenience:** It was mentioned by a number of people that making the swabbing more  
195 convenient would have allowed better participation. Allowing self-swabbing at home and

196 dropping the swab upon arrival at work was brought up on a few occasions. Having the  
197 swabbing station at the front door of the hospital or within the hospital itself so people are  
198 reminded to do it and not inconvenienced was also suggested.

199 • **Time:** This was commonly raised as an issue. Solutions to this focussed on broader testing  
200 windows – running testing earlier or perhaps later (after 5pm) so people did not have to take  
201 time out of work. It was also suggested that a dedicated break could be introduced so that  
202 people could go to the swabbing station without feeling like they were missing work. It was  
203 also suggested by some students that they were reluctant to leave their post if no other staff  
204 were going, so a dedicated testing time, or timings outside of work hours would have  
205 worked better.

206 • **Incentives:** It was mentioned on a few occasions that students were reluctant to attend  
207 because of the fear of missing 2 weeks if they tested positive. Despite emphasis on keeping  
208 fellow workmates safer by getting tested, this was not incentive enough for many. With this  
209 in mind, a number of respondents pointed out that incentives might encourage more  
210 participation. Incentives such as the ability to use a testing certificate to be allowed to do  
211 more things, partake in more activities. Other incentives such as sweets, a bottle of wine for  
212 the most participation etc. were also mentioned.

213 *Further comments.* A total of 58 people responded to this question. Answers were provided as free-  
214 text, but can be summarised as follows:

- 215 • Reduced anxiety among workers.
- 216 • Created a feeling of an extra layer of safety in the workplace and worked well alongside all  
217 other mitigations such as mask wearing, hand sanitisation and increased ventilation.
- 218 • An understanding that it reduced but didn't remove the possibility of a superspreading event  
219 in the workplace.
- 220 • Great initiative.
- 221 • Friendly and welcoming.
- 222 • Good information and training.

223 These comments are summarised in the word cloud generated from the answers (figure 3)





238 2 transmission. The testing programme was conducted on a regular basis over a 6-week pilot with a  
239 relatively large group of workers and students.

240 b. Feasibility, including lessons learned

241 The pilot study was implemented successfully, and a relatively large group of staff and students were  
242 tested on a regular basis in a safe and efficient manner over the 6-week period. Further, as a result  
243 of the trial, the participants reported a decrease in anxiety in the workplace and increased  
244 confidence among workers. The testing programme allowed participants to carry out their work  
245 aware that an extra layer of risk reduction was in place alongside other risk mitigations such as high-  
246 grade masks, physical distancing, hand cleanliness and increased ventilation. Importantly, the  
247 introduction of the antigen testing was not associated with a noticeable decrease in people  
248 following HSE guidelines around the other risk mitigations, so risk of a COVID-19 outbreak in the  
249 workplace was decreased overall.

250 There was excellent feedback from staff and students in relation to the information they received  
251 beforehand as well as the training videos. Nonetheless, the initial swabbing technique among  
252 participants varied greatly, highlighting the importance of on-hand assistance for first-time  
253 participants. Correct nasal swabbing technique will likely improve test sensitivity and it is vital that  
254 this aspect is performed correctly every time. The current study found that after some initial one-to-  
255 one direction, technique became relatively uniform and efficient.

256 The strengths and weaknesses of rapid antigen tests were clearly highlighted to participants,  
257 including prudent interpretation of test results. In particular, an understanding that while a positive  
258 means that the individual is very likely to be infected and shedding virus, a negative test means that  
259 virus was not detected at this point but it did not mean you aren't infected, and therefore one  
260 should continue to follow all other public health guidelines. The major benefit of an antigen test is  
261 that it will pick up highly infectious people efficiently and conveniently, but with the possibility of  
262 missing infected people. This was clearly explained to participants in the information leaflet. These  
263 messages have been informed by earlier experience of rapid antigen testing in Ireland, during  
264 ongoing screening of asymptomatic people in meat processing plants in January 2021<sup>13</sup>. Over 5000  
265 people were tested by both PCR and antigen test, with no evidence of false positive results (a  
266 specificity of 100%). In the meat processing plant study, the sensitivity was found to be  
267 approximately 80% in people with a PCR Ct below 25 %, falling below 60% in people with Ct values  
268 above 30.

269 In the current study, there were no changes to existing mitigation practices within the veterinary  
270 hospital. The overwhelming sentiment from staff and students was that antigen testing provided  
271 extra reassurance, and greater confidence that the working environment was a safer place to be.  
272 From a mental health and team morale point of view, this was reported as being a successful and  
273 important consequence of the study.

274 c. Limitations, including lessons learned

275 High levels of participation are vital to make any testing regime effective. Reliance on people staying  
276 away from the University campus when symptoms appear is not sufficient to prevent COVID-19  
277 outbreaks, given that asymptomatic and mildly symptomatic people can also shed virus. Serial  
278 testing by either rapid antigen test or PCR is conducted independent of symptoms, focusing instead  
279 on the detection of highly infectious people. In order to carry out a test on a serial basis, however, it  
280 should ideally be easy to perform, convenient and cheap. It should be cost-effective, and people  
281 must be willing to submit to testing regularly.

282 In the staff cohort, participation levels were high (75-90 %) and commentary about the test was  
283 generally very positive with regular use of words such as peace of mind, confidence and safe in the  
284 survey. No concerns were raised about the test itself. In contrast, the participation in the student  
285 group was very low (19%), which appears to be due to a number of contributing factors. Among  
286 students, a common reason given in the survey and also verbally during the study, when queried,  
287 was the fear of testing positive and the consequent impact on their studies. The timing of the pilot  
288 study may have played a role in this anxiety, as it was the final few weeks of term before graduation,  
289 with exams approaching and rotations in the hospital pending that needed completion. Nonetheless,  
290 it is worrying that some people would place these concerns ahead of the benefit that would accrue  
291 from a positive test result, including the reduction in infection risk, which could potentially be  
292 devastating, for fellow staff and students. It would be informative to conduct a similar pilot study at  
293 a different time of year, when similar pressures are not present (the start of the academic term for  
294 example), to see if this issue dissipates. Another common reported issue was time. Although this was  
295 a factor for both staff and students, students may have felt extra pressure, either consciously or  
296 otherwise, to avoid missing time in hospital for the sake of a test. It is apparent, based on feedback  
297 from both staff and students, that convenience is a priority and would help participants to  
298 participate more regularly, particularly when time is at a premium.

299 Throughout the pilot study, messaging in support of participation had a strong public good element,  
300 seeking to reduce infection risk both to the individual and their fellow classmates / workmates /  
301 hospital as a whole. While this apparently worked well with staff, it did not appear to resonate with

302 the vast majority of students at our institution. The interplay between public good and private  
303 benefit has been considered in several recent papers, with differing results. In a recent study from  
304 the US, Thunström et al. (2021) found that healthy younger people were more likely to take a no-  
305 cost COVID-19 test than health older people, with people generally selfless in their decision to test  
306 for COVID-19<sup>14</sup>. In contrast, Fallucchi et al. (2021) found that willingness-to-test was increased in  
307 association with altruism, conformism and risk-aversion and decreased with decreasing age and  
308 increased willingness to take risks<sup>15</sup>. Messaging tailored to our students with an emphasis on  
309 personal benefits or rewards may have been more successful. Indeed, a bottle of wine was  
310 suggested by one survey respondent or sweets for every swab by another. Incentives may be a way  
311 to encourage participation in the student cohort and this is something that needs to be considered  
312 going forward, although this would then have to be made available for staff too.

#### 313 d. Conclusions

314 In conclusion, the trial showed that antigen testing could be carried out effectively and efficiently in  
315 a university setting with a relatively large cohort, on a regular basis. The study also identified  
316 differences in participation in the staff and student cohort, suggesting different approaches are  
317 needed to incentivise different cohorts. Future studies will focus on promoting how a testing regime  
318 can bring personal benefits to students, rather than emphasising the benefit of increasing safety to  
319 others. Future work will also focus on convenience and the potential, for example, of running at  
320 home testing and self-reporting rather than attending a testing centre.

321 Because of the concern around participation, it could also be considered to deploy rapid testing  
322 during times of case number surges only, rather than on a serial basis during times when case  
323 numbers were stable or low. One could initially train large cohorts to carry out self-testing during  
324 times when cases were low and if the need arose, because of a surge of cases in a concentrated  
325 geographical area, test sites could be rapidly set up to test large numbers of people in a short space  
326 of time. While not ideal theoretically, because regular testing would be better as a risk mitigation  
327 strategy, practically, surge testing might be more feasible and cost effective.

328

#### 329 Acknowledgements:

330 We would like to thank University College Dublin for supporting this study. We thank all participants,  
331 both students and staff of University College Dublin for taking part.

#### 332 Competing interests:

333 The authors declare that they have no competing interests.

334

- 335 1. Casey-Bryars M, Griffin J, McAloon C, Byrne A, Madden J, Evoy DM, et al. Presymptomatic  
336 transmission of SARS-CoV-2 infection: a secondary analysis using published data. *BMJ Open*  
337 [Internet]. 2021 Jun 1 [cited 2021 Jul 12];11(6):e041240. Available from:  
338 <https://bmjopen.bmj.com/content/11/6/e041240>
- 339 2. Johansson MA, Quandelacy TM, Kada S, Prasad PV, Steele M, Brooks JT, et al. SARS-CoV-2  
340 Transmission from People without COVID-19 Symptoms. *JAMA Network Open* [Internet].  
341 2021 Jan 1 [cited 2021 Apr 28];4(1). Available from:  
342 <https://pubmed.ncbi.nlm.nih.gov/33410879/>
- 343 3. McEvoy D, McAloon C, Collins A, Hunt K, Butler F, Byrne A, et al. Relative infectiousness of  
344 asymptomatic SARS-CoV-2 infected persons compared with symptomatic individuals: A rapid  
345 scoping review [Internet]. Vol. 11, *BMJ Open*. BMJ Publishing Group; 2021 [cited 2021 May  
346 27]. Available from: <https://pubmed.ncbi.nlm.nih.gov/33947725/>
- 347 4. Yang Q, Saldi TK, Gonzales PK, Lasda E, Decker CJ, Tat KL, et al. Just 2% of SARS-CoV-  
348 2-positive individuals carry 90% of the virus circulating in communities. *Proceedings of the*  
349 *National Academy of Sciences* [Internet]. 2021 May 25 [cited 2021 May  
350 11];118(21):e2104547118. Available from:  
351 <http://www.pnas.org/lookup/doi/10.1073/pnas.2104547118>
- 352 5. Kawasuji H, Takegoshi Y, Kaneda M, Ueno A, Miyajima Y, Kawago K, et al. Transmissibility of  
353 COVID-19 depends on the viral load around onset in adult and symptomatic patients. Pan X,  
354 editor. *PLOS ONE* [Internet]. 2020 Dec 9 [cited 2021 Apr 13];15(12):e0243597. Available from:  
355 <https://dx.plos.org/10.1371/journal.pone.0243597>
- 356 6. Dinnes J, Deeks JJ, Berhane S, Taylor M, Adriano A, Davenport C, et al. Rapid, point-of-care  
357 antigen and molecular-based tests for diagnosis of SARS-CoV-2 infection [Internet]. Vol. 2021,  
358 *Cochrane Database of Systematic Reviews*. John Wiley and Sons Ltd; 2021 [cited 2021 May  
359 27]. Available from: <https://pubmed.ncbi.nlm.nih.gov/33760236/>
- 360 7. Pollock NR, Lee F, Ginocchio CC, Yao JD, Humphries RM. Considerations for Assessment and  
361 Deployment of Rapid Antigen Tests for Diagnosis of COVID-19. *Open Forum Infectious*  
362 *Diseases* [Internet]. 2021 Mar 7 [cited 2021 May 27]; Available from:  
363 <https://academic.oup.com/ofid/advance-article/doi/10.1093/ofid/ofab110/6161332>
- 364 8. Crozier A, Rajan S, Buchan I, McKee M. Put to the test: Use of rapid testing technologies for  
365 Covid-19. *The BMJ* [Internet]. 2021 Feb 3 [cited 2021 May 11];372. Available from:  
366 <http://dx.doi.org/10.1136/bmj.n208>
- 367 9. WHO. Antigen-detection in the diagnosis of SARS-CoV-2 infection using rapid immunoassays  
368 Interim guidance. 2020.
- 369 10. Bohn MK, Lippi G, Horvath AR, Erasmus R, Grimm M, Gramegna M, et al. IFCC interim  
370 guidelines on rapid point-of-care antigen testing for SARS-CoV-2 detection in asymptomatic  
371 and symptomatic individuals. *Clinical Chemistry and Laboratory Medicine* [Internet]. 2021  
372 [cited 2021 May 27]; Available from: <https://pubmed.ncbi.nlm.nih.gov/33908222/>

- 373 11. Wise J. Covid-19: Lateral flow tests miss over half of cases, Liverpool pilot data show. *BMJ*  
374 (Clinical research ed) [Internet]. 2020 Dec 15 [cited 2021 May 27];371:m4848. Available from:  
375 <https://pubmed.ncbi.nlm.nih.gov/33323368/>
- 376 12. Public Health England. Weekly statistics for rapid asymptomatic testing in England: 22 April to  
377 28 April 2021 - GOV.UK [Internet]. [cited 2021 May 27]. Available from:  
378 [https://www.gov.uk/government/publications/weekly-statistics-for-nhs-test-and-trace-](https://www.gov.uk/government/publications/weekly-statistics-for-nhs-test-and-trace-england-22-april-to-28-april-2021/weekly-statistics-for-rapid-asymptomatic-testing-in-england-22-april-to-28-april-2021)  
379 [england-22-april-to-28-april-2021/weekly-statistics-for-rapid-asymptomatic-testing-in-](https://www.gov.uk/government/publications/weekly-statistics-for-nhs-test-and-trace-england-22-april-to-28-april-2021/weekly-statistics-for-rapid-asymptomatic-testing-in-england-22-april-to-28-april-2021)  
380 [england-22-april-to-28-april-2021](https://www.gov.uk/government/publications/weekly-statistics-for-nhs-test-and-trace-england-22-april-to-28-april-2021/weekly-statistics-for-rapid-asymptomatic-testing-in-england-22-april-to-28-april-2021)
- 381 13. Potential impact of different serial testing scenarios using RADTs to detect SARS-CoV-2 in  
382 meat processing plant workers Health Information and Quality Authority Potential impact of  
383 different serial testing scenarios using rapid antigen detection tests (RADTs) to detect SARS-  
384 CoV-2 in meat processing plant workers.
- 385 14. Thunström L, Ashworth M, Shogren JF, Newbold S, Finnoff D. Testing for COVID-19: willful  
386 ignorance or selfless behavior? *Behavioural Public Policy* [Internet]. 2021 [cited 2021 May  
387 31];5(2):135–52. Available from: [https://ideas.repec.org/a/cup/bpubpo/v5y2021i2p135-](https://ideas.repec.org/a/cup/bpubpo/v5y2021i2p135-152_1.html)  
388 [152\\_1.html](https://ideas.repec.org/a/cup/bpubpo/v5y2021i2p135-152_1.html)
- 389 15. Fallucchi F, Görges L, Machado J, Pieters A, Suhrcke M. How to make universal, voluntary  
390 testing for COVID-19 work? A behavioural economics perspective. *Health Policy* [Internet].  
391 2021 May 16 [cited 2021 May 31]; Available from:  
392 [https://liser.elsevierpure.com/en/publications/how-to-make-universal-voluntary-testing-for-](https://liser.elsevierpure.com/en/publications/how-to-make-universal-voluntary-testing-for-covid-19-work-a-behav)  
393 [covid-19-work-a-behav](https://liser.elsevierpure.com/en/publications/how-to-make-universal-voluntary-testing-for-covid-19-work-a-behav)
- 394
- 395
- 396
